# Supplementary material for: RPpocket: An RNA–Protein Intuitive Database with RNA Pocket Topology Resources
Source: MDPI journal article supplement (doi:10.3390/ijms23136903), 2022-06-21
Supplement: s1 [file s1]

## Supplementary Information

# RPpocket: An RNA–Protein Intuitive Database with RNA Pocket Topology Resources

Rui Yang <sup>†</sup>, Haoquan Liu <sup>†</sup>, Liu Yang, Ting Zhou, Xinyao Li and Yunjie Zhao <sup>\*</sup>

Institute of Biophysics and Department of Physics, Central China Normal University, Wuhan 430079, China; ryang@mails.ccnu.edu.cn (R.Y.); liuhaoquan@mails.ccnu.edu.cn (H.L.); YL2019212120@mails.ccnu.edu.cn (L.Y.); tzhou@mails.ccnu.edu.cn (T.Z.); lixinyao@mails.ccnu.edu.cn (X.L.)

<sup>\*</sup> Correspondence: yjzhaowh@mail.ccnu.edu.cn

<sup>†</sup> These authors contributed equally to this work.

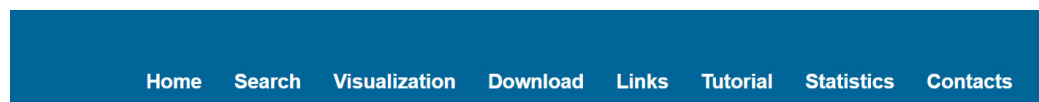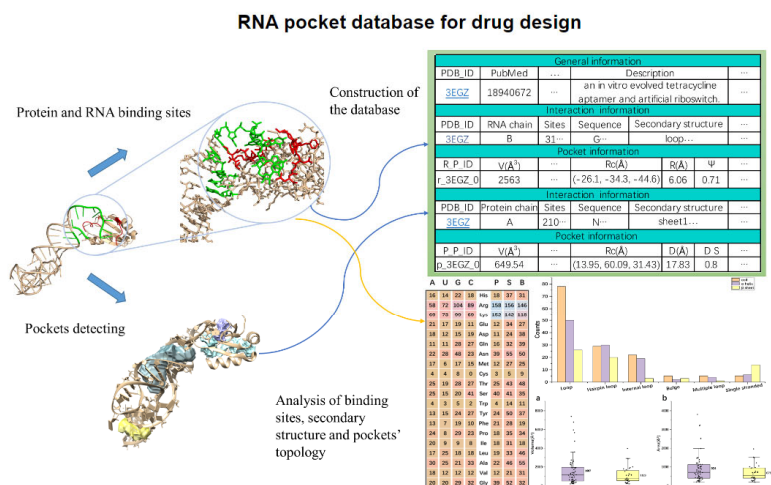

The RNA-protein structural information especially pocket-based interaction information is important for drug discovery targeting cancer or other diseases. Although some RNA-protein complex sequence, structure or drug databases have been developed, the databases cannot be directly used in the drug study. Therefore, a pocket-based interaction database is needed for the RNA-protein interaction mechanism understanding at the molecular level.

This database contains sequence and structure of RNA-protein complex, binding sites and pocket topology information(including volume, area, shape similarity score, effective radius, centroid, and the secondary structural elements the pocket located). It is developed to reveal RNA-protein recognition principles for RNA-related drug development or medical applications.

[Click to view web page access statistics](#)

Zhao Group at Central China Normal University

**Figure S1.** The sketch of the Home module. The Home module introduces the RPpocket database and navigation to other database modules.

RNA Pocket Clusters in RNA-protein Pocket Database

Number of RNA chains:

please select

Number of protein chains:

please select

RNA calss:

please select

Presentative entry PDB\_ID:

please select

Submit

Table. The description of RNAs

| RNA class  | Function description                                                                                                     | Presentative RNA PDB_ID                                                                                                               |
|------------|--------------------------------------------------------------------------------------------------------------------------|---------------------------------------------------------------------------------------------------------------------------------------|
| rRNA       | The component of ribosome, which is usually combined with ribosome protein to form ribosome.                             | 1DK1,1M2P,1RKJ,2HGH,3U4M,5D6G,6AJK,3R9X,2X7N                                                                                          |
| riboswitch | Binding to small molecule metabolites and iron ions ; regulating transcription, translation, shearing and RNA stability. | 3MXH,7D7V                                                                                                                             |
| ribozyme   | RNA with catalytic activity.                                                                                             | 4PR6,2R8S                                                                                                                             |
| snRNA      | Combining with protein factors to form small ribosomal protein particles and perform the function of cutting mRNA.       | 1T4L                                                                                                                                  |
| mRNA       | Carrying genetic information transcribed from DNA; template for protein synthesis                                        | 2HW8,2L2K,2L3J,2L3C,1L1C                                                                                                              |
| tRNA       | As a carrier of amino acids, it is responsible for protein transcription in protein synthesis                            | 1B23,1H3E,1K8W,1OB2,2DR2,2DRB,2MQV,2ZZM,3TUP,5WT3,1H4Q,3QSY,3V11,5X6B                                                                 |
| aptamer    | Combined with specific target molecules.                                                                                 | 3EGZ,4M4O,4PDB,3DD2,4KZD,6CF2                                                                                                         |
| dsRNA      | A common way of gene selective expression, which can inhibit the rapid division of cancer cells in vivo.                 | 1EKZ,2LBS,6SDY,2NUE,4OOG                                                                                                              |
| microRNA   | Complementing with mRNA to silence or degrade mRNA                                                                       | 1L9A,1LNG,2N82                                                                                                                        |
| other      | Other types                                                                                                              | 1A1T,1FJE,1NYB,1U6P,2AB4,2ESE,2FY1,2HX,2N3O,2PJP,2XDB,2Y8W,4AL5,4BW0,6CMN,6GBM,6TPH,6XH1,7K9D,4PML,4UE4,6D12,6U8D,1ZSE,4C7O,6CYT,2MF1 |

**Figure S2.** An example of the Search module. The Search module consists of a pulldown search box and a summary table of RNA clusters. (1) In the pulldown search box, users can select the object by sequence identity cutoff, RNA class, and presentative RNA PDB ID. (2) The RNA description table shows the representative RNAs based on their functions.

## 1. General information

Table1. General information of 1DK1

| General information |          |           |         |                |                   |           |                                            |
|---------------------|----------|-----------|---------|----------------|-------------------|-----------|--------------------------------------------|
| PDB_ID              | PubMed   | RNA class | RNA Nts | Protein length | Method            | Re(A) [1] | Description                                |
| 1DK1                | 10742169 | rRNA      | 57      | 86             | X-RAY DIFFRACTION | 2.8       | Crystal structure of the S15-rRNA complex. |

## 2. Pocket information of 1DK1

Table2. Pocket information of RNA chain

| Interaction surface information |                                   |                                              |                                   |                                   |                                                                       |                   |                 |                                    |
|---------------------------------|-----------------------------------|----------------------------------------------|-----------------------------------|-----------------------------------|-----------------------------------------------------------------------|-------------------|-----------------|------------------------------------|
| PDB_ID                          | RNA chain                         | RNA binding sites                            | Sequence                          | Reported RNA secondary structure? | Secondary structure of the binding sites                              |                   |                 |                                    |
| 1DK1                            | B                                 | 20-24,30-32,33,37-39,40-41,49-50,51-52,53,54 | CGGUG,GGC,U,GCU,GG, GU,GA,C,G     | Yes                               | stem1,stem2,hairpin loop,stem2, internal loop,stem3,bulge,stem4,stem5 |                   |                 |                                    |
| Pocket information              |                                   |                                              |                                   |                                   |                                                                       |                   |                 |                                    |
| R_P_ID <sup>[2]</sup>           | V(Å <sup>3</sup> ) <sup>[3]</sup> | A(Å <sup>2</sup> ) <sup>[4]</sup>            | R <sub>c</sub> (Å) <sup>[5]</sup> | R(Å) <sup>[6]</sup>               | ψ <sup>[7]</sup>                                                      | Binding sites     | Sequence        | Secondary structure <sup>[8]</sup> |
| r_1DK1_0                        | 304                               | 270                                          | (-41.6, -42.4, -36.0)             | 3.37                              | 0.81                                                                  | 52                | A               | bulge                              |
| r_1DK1_1                        | 1529                              | 885                                          | (-39.4, -35.6, -32.6)             | 5.18                              | 0.72                                                                  | 20-24,30-32,37-40 | CGGUG,GGC,GCU G | stem, internal loop                |
| r_1DK1_2                        | 472                               | 328                                          | (-42.3, -42.2, -34.5)             | 4.31                              | 0.89                                                                  | 20                | C               | stem                               |
| r_1DK1_3                        | 192                               | 189                                          | (-44.3, -40.7, -36.7)             | 3.05                              | 0.85                                                                  | N/A               | N/A             | N/A                                |

Table3. Pocket information of protein chain

| Interaction surface information |                    |                                             |                       |                      |                      |                         |                     |                     |                     |                                          |          |                     |
|---------------------------------|--------------------|---------------------------------------------|-----------------------|----------------------|----------------------|-------------------------|---------------------|---------------------|---------------------|------------------------------------------|----------|---------------------|
| PDB_ID                          | protein chain      | Protein binding sites                       |                       |                      | Sequence             |                         |                     |                     |                     | Secondary structure of the binding sites |          |                     |
| 1DK1                            | A                  | 116-117,120-123,124,147-148,150-151,164-165 |                       |                      | RF,DTGS,T,KD,HS,RL   |                         |                     |                     |                     | loop1,loop1,helix1,loop2,helix2,helix2   |          |                     |
| Pocket information              |                    |                                             |                       |                      |                      |                         |                     |                     |                     |                                          |          |                     |
| P_P_ID <sup>[9]</sup>           | V(Å <sup>3</sup> ) | A(Å <sup>2</sup> )                          | R <sub>c</sub> (Å)    | R(Å) <sup>[10]</sup> | D(Å) <sup>[11]</sup> | enclose <sup>[12]</sup> | c/a <sup>[13]</sup> | b/a <sup>[14]</sup> | D S <sup>[15]</sup> | Binding sites                            | Sequence | Secondary structure |
| p_1DK1_0                        | 406.27             | 746.61                                      | (10.00, 50.17, 7.92)  | 14.19                | 13.45                | 0.18                    | 0.05                | 0.18                | 0.65                | 116-117,120-121                          | RF,DT    | loop                |
| p_1DK1_1                        | 248.19             | 572.59                                      | (12.65, 49.22, 23.29) | 11.12                | 10.45                | 0.17                    | 0.19                | 0.1                 | 0.45                | N/A                                      | N/A      | N/A                 |
| p_1DK1_2                        | 157.12             | 422.91                                      | (21.03, 45.50, 32.00) | 6.47                 | 10.69                | 0.31                    | 0.15                | 0.43                | 0.32                | 147-148                                  | KD       | loop                |
| p_1DK1_3                        | 138.32             | 229.05                                      | (7.94, 40.22, 5.76)   | 6.45                 | 8.78                 | 0.26                    | 0.34                | 0.83                | 0.28                | 116                                      | R        | loop                |
| p_1DK1_4                        | 119.74             | 281.98                                      | (12.48, 38.32, 15.53) | 5.53                 | 10.74                | 0.06                    | 0.26                | 0.32                | 0.34                | N/A                                      | N/A      | N/A                 |

**Note.** [1] Re: resolution of the structure; [2]R\_P\_ID: RNA pocket ID; [3] V: volume of the pocket; [4] A: surface area of the pocket; [5] R<sub>c</sub>: center of mass of the pocket; [6] R: effective radius of the pocket; [7] ψ: a measure of how much the pocket resembles a sphere; [8] Secondary structure: secondary structure of RNA/Protein located on the pocket; [9] P\_P\_ID: protein pocket ID. [10] R: maximum radius of the pocket;[11] D: depth of the pocket;[12] enclose: ratio of number of surface to hull grid points;[13] c/a: ellipsoid main axes ratios, with a > b > c;[14] b/a: ellipsoid main axes ratios, with a>b>c;[15] D S : DrugScore for protein pocket

[Click to view the interaction graph of RNA-protein](#)

## 3. Sequence Preview

|                                     |                                                                                                                                 |
|-------------------------------------|---------------------------------------------------------------------------------------------------------------------------------|
| RNA binding sites                   | GGGCGGCCUUCGGGCUAGA <b>CGGUG</b> GGAGA <b>GGC</b> UUCG <b>GCUG</b> UCCACCC <b>CGGAC</b> CGCUC                                   |
| Binding sites on the RNA pocket     | GGGCGGCCUUCGGGCUAGA <b>CGGUG</b> GGAGA <b>GGC</b> UUCG <b>GCUG</b> UCCACCCGUC <b>CGCUC</b>                                      |
| Protein binding sites               | PITKEEKQKVMQEFAR <b>PG</b> <b>DTGS</b> TEVQVALLTLRINRLSEHLKVHK <b>KG</b> <b>HI</b> SHRGLMMVGQRR <b>RL</b> RYLQREDPERYRMILIEKLGI |
| Binding sites on the protein pocket | PITKEEKQKVMQEFAR <b>PG</b> <b>DTGS</b> TEVQVALLTLRINRLSEHLKVHK <b>KG</b> <b>HI</b> SHRGLMMVGQRR <b>RL</b> RYLQREDPERYRMILIEKLGI |

**Figure S3.** An example of RNA 1DK1 search result. The search results include (1) The representative RNA and members in the RNA cluster; (2) the experiment information and pocket calculation results; (3) RNA/Protein binding sites and binding fragments on RNA/protein pockets in different colors. The sequence colored in green shadow represents the RNA-protein interaction or binding sites on the pocket.

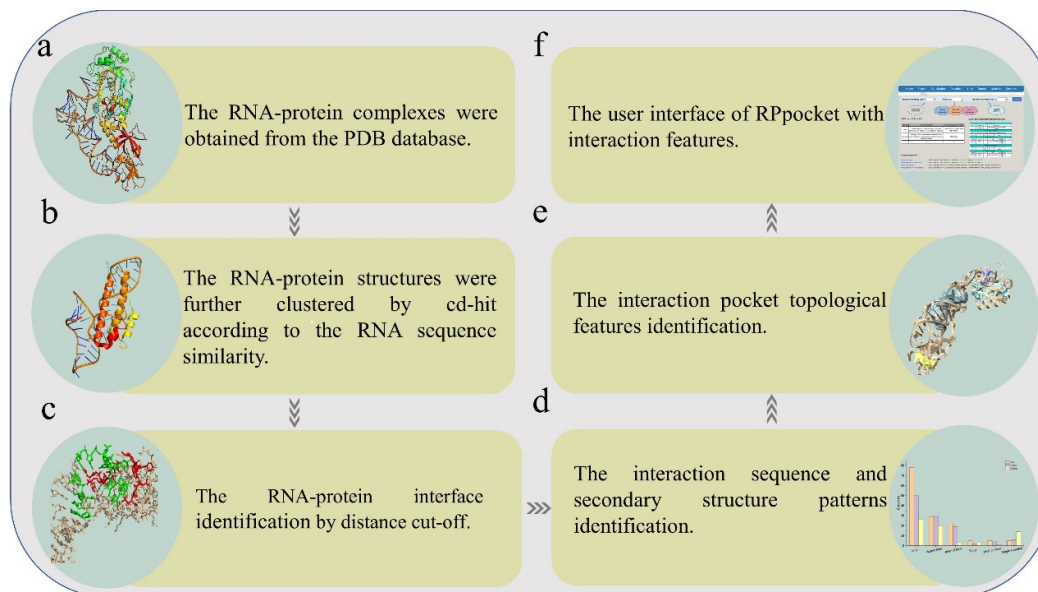

**Figure S4.** The workflow of the database construction. (a) and (b) The non-redundant RNA-protein complex structures identification. (c)-(e) The detection of sequence, secondary structure, and pocket topological interaction patterns. (f) The user interface of the database.

**Table S1.** The RNA-protein structural names for different categories.

|    | RNA class  | Number | PDB ID                                                                                                                                  |
|----|------------|--------|-----------------------------------------------------------------------------------------------------------------------------------------|
| 1  | rRNA       | 9      | 1DK1,1MZP,1RKJ,2HGH,2X7N,3R9X,3U4M,5D6G,6AJK                                                                                            |
| 2  | riboswitch | 2      | 3MXH,7D7V                                                                                                                               |
| 3  | ribozyme   | 2      | 2R8S,4PR6                                                                                                                               |
| 4  | snRNA      | 1      | 1T4L                                                                                                                                    |
| 5  | mRNA       | 5      | 1L1C,2HW8,2L2K,2L3J,2L3C                                                                                                                |
| 6  | tRNA       | 14     | 1B23,1H3E,1H4Q,1K8W,1OB2,2DR2,2DRB,2MQV,2ZZM,3QSY,3TUP,3V11,5WT3, 5X6B                                                                  |
| 7  | aptamer    | 6      | 3DD2,3EGZ,4KZD,4M4O,4PDB,6CF2                                                                                                           |
| 8  | ds RNA     | 5      | 1EKZ,2LBS,2NUE,4OOG,6SDY                                                                                                                |
| 9  | micro RNA  | 3      | 1L9A,1LNG,2N82                                                                                                                          |
| 10 | other      | 27     | 1A1T,1FJE,1NYB,1U6P,1ZSE,2AB4,2ESE,2FY1,2IHX,2MF1,2N3O,2PJP,2XDB,2Y8W,4AL5,4BW0,4C7O,4PMI,4UE4,6CMN,6CYT,6D12,6GBM,6TPH, 6U8D,6XH1,7K9D |

**Table S2.** The sequence and secondary structure information for RNAs.

| PDB ID | The sequence and secondary structure information for RNAs                                                                                                                                                                                       |
|--------|-------------------------------------------------------------------------------------------------------------------------------------------------------------------------------------------------------------------------------------------------|
| >1A1T  | GGACUAGCGGAGGCUAGUCC<br>(((..(((.....))..)))                                                                                                                                                                                                    |
| >1B23  | GGCGCGUUAACAAAGCGGUUAUGUAGCGGAUUGCAAUCCGUCUAGUCC<br>GGUUCGACUCCGGAACGCGCCUCCA<br>(((((((..(((.....[...]))..(((.....))))....((((([...].....))))))))....                                                                                          |
| >1DK1  | GGGCGGCCUUCGGGCUAGACGGUGGGAGAGGCUUCGGCUGGUCCACCCG<br>UGACGCUC<br>((((..(((.....))..(((((((.....(((.....)))..))))..))))..))))                                                                                                                    |
| >1EKZ  | GGACAGCUGUCCCUUCGGGGACAGCUGUCC<br>((((((((((((([...].....))))))))))                                                                                                                                                                             |
| >1FJE  | GGCCGAAAUCCCGAAGUAGGCC<br>(((.....)))                                                                                                                                                                                                           |
| >1K8W  | GGCAACGGUUCGAUCCCGUUGC<br>..((((([...].....))))                                                                                                                                                                                                 |
| >1L9A  | GACACUAAGUUCGGCAUCAUAUUGGUGACCUCUCCGGGAGCGGGGACCACCAG<br>GUUGCCUAAGGAGGGGUGAACCGGCCCAGGUCGGAAACGGAGCAGGUCAAAAC<br>UCCCGUGCUGAUCAGUAGUGUC<br>((((([..((((((((([..((((([.....]))..))))..))))....((((([..([..([.....]))..([..]))..))))..))))..)))) |
| >1LNG  | UCGGCGGUGGGGAGCAUCUCUGUAGGGGAGAUGUAACCCCUUUACCUGCCA<br>CCCCGCCAGGCCCGGAAGGGAGCAACGGUAGGCAGGACGUC<br>..((((([..((((([.....]))..))))....((((([..([..([.....]))..([..]))..))))..))))                                                               |
| >1MZP  | GGAUGCGUAGGAUAGGUGGGAGCCGCAAGGCGCCGGUGAAAUACCACCCUUC<br>C<br>(((([.....[..((((([.....])).....[...]))..))))..))))                                                                                                                                |
| >1NYB  | GGUUCACCUCUAACCGGGUGAGCC<br>((((([.....]))))                                                                                                                                                                                                    |
| >1OB2  | GCGGAUUUAGCUCAGUUGGGAGAGCGCCAGACUGAAGAUCUGGAGGUCCUGUU<br>GAUCCACAGAAUUCGCACCA<br>((((([..(((.....[...]))..(((.....))))....((((([...].....))))))....                                                                                             |
| >1RKJ  | GGAUGCCUCCCGAGUGCAUCC<br>((((([.....]))))                                                                                                                                                                                                       |
| >1T4L  | GGAUACCAUGUUCAGAAGAACGUGGUAUCUC<br>((((((((((((([.....]))))))))))                                                                                                                                                                               |
| >1U6P  | GGCGGUACUAGUUGAGAAACUAGCUCUGUAUCUGGCGGACCCGUGGUGGAAUUG<br>AAGUUCGGAACACCCGGCCGCAACCCUGGGAGAGGUCCAGGGUU<br>..((((([..((((([.....]))..))))....([..([..((((([.....]))..([..]))..))))..))))                                                         |
| >2AB4  | CCACGGUUCGAAUCCGUGGC<br>((((([.....]))..                                                                                                                                                                                                        |
| >2DR2  | GACCUCGUGGCGCAAUGGUAGCGGUCUGACUCCAGAUCAGAAGGUUGCGUGUU<br>CGAAUCACGUCGGGUCACCA<br>((((([.....([.....])....((((([.....]))))))....((((([.....]))))))....                                                                                           |
| >2DRB  | GGCCCGGGGCGGUUCGAUUCGCGCCUGGGCCACCA                                                                                                                                                                                                             |

|       |                                                                                                                                                                     |
|-------|---------------------------------------------------------------------------------------------------------------------------------------------------------------------|
|       | ((((((((((((.....))))))))))....                                                                                                                                     |
| >2ESE | GGAGAGGCUCUGGCAGCUUUUCC<br>((((((((((..))))))))                                                                                                                     |
| >2FY1 | GGACUGUCCACAAGACAGUCC<br>((((((((((.....))))))))                                                                                                                    |
| >2HGH | GGGCCAUACCUCUUGGGCCUGGUUAGUACCUCUUCGGUGGGAUACCAGGUGCC<br>C<br>(((.....((.....))((((((((.....((.....)).....))))))))))                                                |
| >2HW8 | GGGGUGAAGGAGGCUUCGGCCGCGAAACUUCACCCC<br>((((((((((.....)).....))))))                                                                                                |
| >2IHx | CUGCCCUCAUCCGUCUCGCUUAUUCGGGGAGCGGACGAUGACCCUAGUAGAGGG<br>GGCUGCGGCUUAGGAGGGCAG<br>((((((((.....((.....))))))))....((((.....))((.....))....))))                     |
| >2L2K | GGUAAGGUGGGUGGAAUCCUUCGGGAUCCCACCUACCCUGCC<br>(((.....((((((((.....))))))))..)))                                                                                    |
| >2L3C | GGUAGUAUAACAAUAUCCGUGUUGUUAUAGUACC<br>(((.....((((((((.....))))))))..)))                                                                                            |
| >2L3J | GGCAUUAAGGUGGGUGGAAUAGUAUAACAAUAUGCUAAAUGUUGUUAUAGUAU<br>CCCACCUACCCUGAUGCC<br>((((((((.....((.....))((((((((.....))))))))..))))..))))..))))                        |
| >2LBS | GGGAUACCAUGUUAAGUGAACGUGGUAUCUC<br>((((((((((((.....))))))))))                                                                                                      |
| >2MQV | GGGCGAGGGUCUCCUCUGAGUGAUUGACUACCCGUCAGCGGGGGUCUUUCAUUU<br>GGGGGCUCGUGCCC<br>((((((((.....((.....))((((((((.....))))))))..))))..))))..))))                           |
| >2PJP | GGCGGUUGCAGGUCUGCACCGCC<br>((((((((.....))))))                                                                                                                      |
| >2XDB | AUUCAGGUGAUUUGCUACCUUUAAGUGCAGCUAGAAAUC<br>....((((.....[[.]]))....]]].....                                                                                         |
| >2Y8W | UCCCCACGCGUGUGGGGAUG<br>..((((.....))))...                                                                                                                          |
| >2ZZM | GCAGGGGUCGCCAAGCCUGGCCAAAGGCGCUGGGCCUAGGACCCAGUCCCGUAG<br>GGGUUCCAGGGUUCAAAUCCCUGCCCCUGCACCA<br>.....(..((((.....))))((((((((.....))))))((.....)).....((.....))...) |
| >3EGZ | GAGGGAGAGGUGAAGAAUACGACCACCUAGGUACCAUUGCACCCGGUACCUAAA<br>ACAUACCCUC<br>((((.....((.....))))((((((((.....)))))).....))                                              |
| >3MZH | GGUCACGCACAGGGCAAACCAUUCGAAAGAGUGGGACGCAAAGCCUCCGGCCUA<br>AACCAUUGCACUCCGGUAGGUAGCGGGGUUACCGAUGG<br>...((.....((.....((.....))))..D)...(((.....((.....))))..D)...)  |
| >3TUP | GCCGAGGUAGCUCAGUUGGUAGAGCAUGCGACUGAAAAUCGCAGUGUCGGCGGU<br>UCGAUUCUGCUCCUCGGCACCA<br>((((.....((.....[.]))((((.....))))....((((.....))))))..                         |

|       |                                                                                                                                                  |
|-------|--------------------------------------------------------------------------------------------------------------------------------------------------|
| >3U4M | GGAUGCGUAGGAUAGGUGGGAGCCUGUGAACCCCGCCUCCGGGUGGGGGGGA<br>GGCGCCGGUGAAAUACCACCCUUCCC<br>((((.....[.((((.....((((((((.....))))))....)).....].)))))) |
| >4AL5 | ACUGCCGUAUAGGCAG<br>.((((.....))))                                                                                                               |
| >4BW0 | GGGGGAGCCGAAAGGCGAAGAACCCA<br>(((.....)).....).                                                                                                  |
| >4PDB | GGAUGCUCAGUGAUCCUUCGGGAUAUCAGGGCAUCCC<br>((((((((.....((((.....)).)).))))))                                                                      |

**Table S3.** Statistical secondary structure analysis for RNA-protein interactions.

| RNA class  | RNA secondary structure |                 |                  |        |                   |                     | Protein secondary structure |        |         |
|------------|-------------------------|-----------------|------------------|--------|-------------------|---------------------|-----------------------------|--------|---------|
|            | stem                    | Hairpin<br>loop | Internal<br>loop | bulge  | multiple<br>loops | single-<br>stranded | loop                        | helix  | β-sheet |
| rRNA       | 60.00%                  | 8.00%           | 20.00%           | 8.00%  | 4.00%             | 0                   | 36.59%                      | 39.02% | 24.39%  |
| riboswitch | 0                       | 100%            | 0                | 0      | 0                 | 0                   | 62.50%                      | 0      | 37.50%  |
| ribozyme   | 40.00%                  | 40.00%          | 0                | 0      | 0                 | 20.00%              | 50.00%                      | 16.67% | 33.33%  |
| snRNA      | 50.00%                  | 50.00%          | 0                | 0      | 0                 | 0                   | 50.00%                      | 50.00% | 0       |
| mRNA       | 35.71%                  | 21.43%          | 42.86%           | 0      | 0                 | 0                   | 55.00%                      | 40.00% | 5.00%   |
| tRNA       | 48.15%                  | 33.33%          | 3.71%            | 0      | 3.71%             | 11.1%               | 49.40%                      | 27.71% | 22.89%  |
| aptamer    | 66.67%                  | 16.67%          | 0                | 16.66% | 0                 | 0                   | 47.06%                      | 17.65% | 35.29%  |
| ds RNA     | 50.00%                  | 50.00%          | 0                | 0      | 0                 | 0                   | 46.16%                      | 38.46% | 15.38%  |
| micro RNA  | 36.37%                  | 36.36%          | 27.27%           | 0      | 0                 | 0                   | 45.45%                      | 31.82% | 22.73%  |
| other      | 42.86%                  | 31.43%          | 5.71%            | 5.71%  | 2.86%             | 11.43%              | 47.96%                      | 29.59% | 22.45%  |

**Table S4.** The pocket geometrical information for different RNA categories.

| RNA class  | Volume (Å <sup>3</sup> ) |                 | Surface area (Å <sup>2</sup> ) |                 |
|------------|--------------------------|-----------------|--------------------------------|-----------------|
|            | non-binding pockets      | binding pockets | non-binding pockets            | binding pockets |
| rRNA       | 224.50±45.96             | 1309.82±1592.59 | 224.50±50.20                   | 727.64±679.69   |
| riboswitch | 626.25±340.81            | 2567.00±3090.06 | 428.00±197.05                  | 1458.50±1511.09 |
| tRNA       | 1193.80±636.15           | 1525.93±880.73  | 739.30±330.26                  | 900.79±431.69   |
| aptamer    | 2263.50±2430.33          | 1985.50±816.71  | 1187.00±1097.43                | 1021.00±350.72  |
| micro RNA  | 1711.00±1609.38          | 3062.60±3055.44 | 949.00±759.43                  | 1645.40±1445.49 |
| other      | 1035.89±480.50           | 1037.80±619.10  | 630.44±222.94                  | 655.40±308.91   |
| all        | 1122.91±889.85           | 1607.03±1605.85 | 678.94±425.09                  | 923.77±772.47   |

**Table S5.** The differences distinguish RPpocket from the existing databases.

| Name          | Type            | Information |           |               |       |                        | Reference |
|---------------|-----------------|-------------|-----------|---------------|-------|------------------------|-----------|
|               |                 | Sequence    | Structure | Binding sites | Motif | Geometrical properties |           |
| HIPPIE        | protein-protein | √           | √         |               |       |                        | [1]       |
| Tissue Net    |                 | √           | √         |               |       |                        | [2]       |
| MyProtein Net | protein-        | √           | √         |               |       |                        | [3]       |
| BioGRID       | drug            | √           | √         | √             | √     |                        | [4]       |
| NPInter       |                 | √           | √         | √             |       |                        | [5]       |
| DBBP          | RNA-            | √           | √         |               | √     |                        | [6]       |
| RNAInter      | protein         | √           | √         | √             |       |                        | [7]       |
| RPpocket      |                 | √           | √         | √             | √     | √                      |           |

**References**

1. Alanis-Lobato G, Andrade-Navarro MA, Schaefer MH; HIPPIE v2.0: enhancing meaningfulness and reliability of protein-protein interaction networks. *Nucleic Acids Res.* 2017; 45: D408–D414.
2. Barshir R, Basha O, Eluk A, Smoly IY, Lan A, Yeger-Lotem E; The TissueNet database of human tissue protein-protein interactions. *Nucleic Acids Res.* 2013; 41: D841–D844.
3. Basha O, Flom D, Barshir R, Smoly I, Tirman S, Yeger-Lotem; MyProteinNet: build up-to-date protein interaction networks for organisms, tissues and user-defined contexts. *Nucleic Acids Res.* 2015; 43: W258–W263.
4. Oughtred, Rose et al. “The BioGRID interaction database: 2019 update.” *Nucleic acids Res.* 2019; 47: D529-D541.
5. Teng X, Chen X, Xue H, Tang Y, Zhang P, Kang Q, et al. NPInter v4.0: an integrated database of ncRNA interactions. *Nucleic Acids Res.* 2019;48: D160-D165.
6. Park B, Kim H, Han K. DBBP: database of binding pairs in protein-nucleic acid interactions. *BMC Bioinformatics.* 2014;15 Suppl 15: S5-S13.
7. Lin Y, Liu T, Cui T, Wang Z, Zhang Y, Tan P, et al. RNAInter in 2020: RNA interactome repository with increased coverage and annotation. *Nucleic Acids Res.* 2019;48: D189-D197.
